# Supplementary material for: Nanomechanical characterisation of a water-repelling terpolymer coating of cellulosic fibres
Source: Springer Nature journal article supplement (doi:10.1007/s10570-020-03675-9), 2021-01-16
Supplement: MOESM1 [file 10570_2020_3675_MOESM1_ESM.docx]

Supplementary Information for

Comprehensive investigation of a water-repelling polymer coating for cellulose-based samples by a direct comparison of un- and modified fibres

Julia Auernhammer1$, Alena K. Bell1$, Marcus Schulze1, Yue Du1, Lukas Stühn1, Sonja Wendenburg2, Isabelle Pause3, Markus Biesalski2, Wolfgang Ensinger3, Robert W. Stark1*

1 Physics of Surfaces, Institute of Materials Science, Technische Universität Darmstadt, Alarich-Weiss-Str. 16, 64287 Darmstadt, Germany

2 Makromolekulare Chemie und Papierchemie, Institute of Chemistry, Technische Universität Darmstadt, Alarich-Weiss-Str. 8, 64287 Darmstadt, Germany

3 Materialanalytik, Institute of Materials Science, Technische Universität Darmstadt, Alarich-Weiss-Str. 2, 64287 Darmstadt, Germany

$ Both authors contributed equally to this work.

*corresponding author,

[stark@pos.tu-darmstadt.de](mailto:stark@pos.tu-darmstadt.de),

Phone: 061511621920

Fax: 061511621921

Keywords: Cellulose, Cotton Linters, Eucalyptus, P(S-co-MABP-co-PyMA), Hydrophobicity, Scanning Electron Microscopy, Contact Angle Goniometry, Fluorescence Microscopy, Raman Spectroscopy, Atomic Force Microscopy

S1 – SEM images of cellulose samples with higher magnification

**Figure S1** SEM images of LP (a), EP (b), PCLP (c), and PCEP (d) at 1500x magnification

On the SEM images a higher entanglement is observed for LP (Figure S1 (a)) than for EP (Figure S1 (b)). After the coating the surface is smoother and the entanglements could not be distinguished anymore.

S2 – Fluorescence Microscopy images of unmodified cellulose samples

**Figure S2** Fluorescence Microscopy images of the unmodified paper samples LP (a) and EP (b). The scale bar represents 300 µm

Fluorescence Microscopy images show a homogeneously distributed, slight fluorescence caused by the background light in the laboratory.

S3 – Raman Spectroscopy

**Figure S3** Raman spectrum of P(S-co-MABP-co-PyMA) with the labeled polymer bands. The spectrum was taken with 10 accumulation and 10s integration time each

The Raman spectrum of the terpolymer P(s-co-MABP-co-PyMA) showed a superposition of the Raman spectra of the single components PS, BP, and Pyrene. The green labeled peaks in the Raman spectrum are listed in Table S1.

**Table S1** Characteristic vibrational motions of cellulose (Osterberg, Schmidt, and Jaaskelainen 2006), PS (Brun et al. 2013; Hong et al. 1991), BP (Babkov et al. 2006), and Pyrene (Xie et al. 2010)

| Label (Fig. 5 and Fig. S3) | Raman shift (cm-1) | Bond | Movement | Material |
| --- | --- | --- | --- | --- |
| P1 | 137-225 | Carbonyl group | Deformation and Torsion | Benzophenone (BP) |
| C1 | 379-516 | CC, COC OCC, OCO | Skeletal bend | Cellulose |
| P2 | 405 |  | Skeletal stretching | Pyrene, BP |
| P3 | 619 | Phenyl ring | Deformation | BP |
| P4 | 1000 | CH, CC | Rocking, Stretching | PS, BP |
| C2 | 1095, 1118 | CC, CO | Stretching | Cellulose |
| C3 | 1290 | HCC, HCO | Bending | Cellulose |
| P5 | 1151-1392 | CH, CCC, CH | Stretching, Bending | Pyrene, BP, PS |
| C4 | 1334, 1376, 1476 | HCC, HCO, HOC, HCH | Bending | Cellulose |
| P6 | 1598 | CC, Ring | Stretching | Pyrene, PS, BP |
| C5 | 2800-3000 | CH, CH2 | Stretching | Cellulose |
| P7 | 2800-3000 | CH, CH2 | Stretching | PS, BP |
| P8 | 3058 | CH | Stretching | PS, BP |
| C6 | 3200-3500 | OH | Stretching | Cellulose |

Hydration experiments with *in situ* Raman spectroscopy using point scans are shown in Figure S2 (a) and (b) for linters and eucalyptus, respectively. The results of the humidity experiments with an extended adjustment time of 180 min are given in Figure S2 (c) and (d). For the adjustment times of 60 min point Raman measurements were used, while for the extended humidity adjustment times (180 min) mapscans were used.

**Figure S4** Results from hydration experiments with in situ Raman spectroscopy for different humidity adjustment times: 60 min (a and b) and 180min (c and d) and different materials: LP and PCLP (a and c), EP and PCEP (b and d). The unmodified paper samples are represented in red (left bar), the polymer coated ones in blue (right bar). The integrated intensity is the summed intensity in the OH stretching spectral region (3200-3500 cm-1)

Babkov, L, J Baran, NA Davydova, VI Mel'nik, and KE Uspenskiy. 2006. 'Raman spectra of metastable phase of benzophenone', *Journal of molecular structure*, 792: 73-77.

Brun, N., I. Youssef, M. C. Chevrel, D. Chapron, C. Schrauwen, S. Hoppe, P. Bourson, and A. Durand. 2013. 'In situ monitoring of styrene polymerization using Raman spectroscopy. Multi-scale approach of homogeneous and heterogeneous polymerization processes', *Journal of Raman Spectroscopy*, 44: 909-15.

Hong, P. P., F. J. Boerio, S. J. Clarson, and S. D. Smith. 1991. 'An Investigation of the Interdiffusion of Polystyrene and Deuterated Polystyrene Using Surface-Enhanced Raman-Scattering', *Macromolecules*, 24: 4770-76.

Osterberg, M., U. Schmidt, and A. S. Jaaskelainen. 2006. 'Combining confocal Raman spectroscopy and atomic force microscopy to study wood extractives on cellulose surfaces', *Colloids and Surfaces a-Physicochemical and Engineering Aspects*, 291: 197-201.

Xie, Yunfei, Xu Wang, Xiaoxia Han, Xiangxin Xue, Wei Ji, Zhenhui Qi, Junqiu Liu, Bing Zhao, and Yukihiro Ozaki. 2010. 'Sensing of polycyclic aromatic hydrocarbons with cyclodextrin inclusion complexes on silver nanoparticles by surface-enhanced Raman scattering', *Analyst*, 135: 1389-94.
